1 Shift in bacterial taxa precedes morphological plasticity in a larval echinoid

2

3 **Authors:**

4 Tyler J. Carrier<sup>1,\*</sup> and Adam M. Reitzel<sup>1</sup>

5

6 **Affiliations:**

7 <sup>1</sup> Department of Biological Sciences, University of North Carolina at Charlotte, Charlotte,

8 NC USA

9 \* Corresponding author: [tcarrier1@uncc.edu](mailto:tcarrier1@uncc.edu)

10

11 **Running title:** Shifting microbiota precedes plasticity

12

13 **Keywords:** symbiosis; host-microbe; *Lytechinus*; microbiome

14

15

16 **Abstract**

17 Morphological plasticity is an adaptive response to heterogenous environments when  
18 a fitness advantage is conferred. Larval sea urchins, for example, increase individual fitness  
19 in dilute feeding environments by elongating their feeding structure. Morphological  
20 plasticity for larval sea urchins is also coupled with significant shifts in the associated  
21 bacterial community, but whether this response occurs before, during, or following the  
22 expression of plasticity is unclear. Using the sea urchin *Lytechinus variegatus*, we define  
23 the temporal pattern of the associated bacterial community throughout the expression of  
24 morphological plasticity. From prefeeding through plasticity, we observed that *L.*  
25 *variegatus* larvae exhibit a four-stage successional pattern and the relatedness of the larval-  
26 associated bacterial community directly reflects morphological plasticity and does so prior  
27 to expression of the environmental-specific morphology. Based on the structure of the  
28 larval-associated bacterial communities, the expression of morphological plasticity  
29 correlates short-arm larvae deviating from the microbial trajectory of pre-plastic siblings.  
30 Taken together, these data suggest that a holobiont may exhibit shifts in the associated  
31 bacterial community corresponding with the environmental variation in absence or  
32 anticipation of morphological plasticity.

33

34

## 35 1. Introduction

36 As the environment ebbs and flows, animals from diverse phylogenetic lineages may  
37 modify phenotypic traits to better match environmental conditions [1-3]. When phenotypic  
38 plasticity—the potential to produce a range of phenotypes from a single genotype—is  
39 induced and confers a fitness advantage, the response is considered adaptive and an  
40 evolvable trait influenced by natural selection [1-3]. For morphological characters to  
41 exhibit plasticity favored by selection, abiotic or biotic stimuli must be reliable and  
42 detected at an appropriate time scale to elicit a developmental change in a structure that  
43 results in a phenotype-environment match [1, 4, 5]. Plasticity in morphology and other life  
44 history characters are, thus, viewed as a product of host genotype and the environment [1-  
45 3, 6, 7]. Recent evidence, however, suggests that phenotypic state also correlates with the  
46 composition of the symbiotic bacterial community [8, 9].

47 Host-associated microbial communities are fundamental to the metabolism, immunity,  
48 and development of the host [10-12]. Symbiotic relationship between host and microbiota  
49 have deep evolutionary origins, often exhibit co-divergence over evolutionary time, and  
50 can be important for coping with environmental stressors [13, 14]. When faced with  
51 heterogeneous environments that are known to induce phenotypic plasticity, an animal may  
52 recruit, expel, and/or shuffle the membership and relative proportion of associated  
53 microbiota to assemble a community with specific functional properties (*e.g.*, genes and  
54 metabolic pathways) for the environmental conditions [12, 15-18]. When faced with  
55 prolonged diet restriction, for example, the composition and diversity of invertebrate- and  
56 vertebrate-associated bacterial communities shifts considerably to buffer against reduced  
57 exogenous nutrients [9, 19].

58 Planktotrophic (feeding) larvae of benthic marine inhabit coastal seas, where the  
59 abundance and distribution of exogenous nutrients are spatially and temporally  
60 heterogeneous [20]. Several groups of planktotrophic larvae, including sea urchins  
61 (phylum Echinodermata), respond to heterogeneous feeding environments by exhibiting  
62 morphological plasticity [21]. To increase individual fitness in the face of diet-restriction,  
63 larval sea urchins suppress development of the larval body and absorb stomach tissues to  
64 allocate energetic resources towards the feeding structures that, in turn, increases the  
65 capacity to collect particulates [22-27]. Moreover, morphological plasticity by echinoid  
66 larvae is coupled with physiological plasticity [28, 29], whereby diet-restriction correlates  
67 with reduced expression of genes associated with growth and metabolism and higher  
68 expression of genes involved with neurogenesis, environmental sensing, immunity, and  
69 longevity [29].

70 Larval sea urchins associate with bacterial communities that are diverse and dynamic  
71 yet specific to host species [9, 30], variable between populations [31], and distinct from  
72 the environmental microbiota [9, 30, 31]. Larval-associated bacterial communities shift  
73 over the course of embryonic development [30], with disease [32], and in response to food  
74 availability [9, 31, 33]. Specifically, the bacterial community associated with echinoid  
75 larvae exhibits bi-directional shifts that correlate with phenotype [9]. This correlation  
76 between morphological plasticity and the composition of the associated bacterial  
77 community, thus far, is unique to echinoid larvae, but recent data suggests similar  
78 responses in taxa from disparate clades [8]. What remains unclear is whether associating  
79 with a phenotype-specific bacterial community occurs before, during, or following the  
80 expression of morphological plasticity.

81 The expression of morphological plasticity by temperate Strongylocentrotids requires  
82 a multi-week stimulus [9, 22, 23, 31], which is restrictive for defining the temporal  
83 succession by the holobiont during morphological plasticity. Tropical and subtropical sea  
84 urchins, on the other hand, develop at a relatively rapid pace and may express plasticity in  
85 a few days [34-36]. This shortened developmental window permits a narrow time frame  
86 for changes in morphology and associations with bacteria that can be studied at a finer  
87 grain than species with prolonged larval durations. Using *Lytechinus variegatus*, a  
88 subtropical/tropical sea urchin known to exhibit morphological plasticity in four days [35-  
89 37], we define this temporal succession and test the hypothesis that shifts in the bacterial  
90 taxa precede a morphological response. To test this, we performed a differential feeding  
91 experiment on *L. variegatus* larvae and used amplicon sequencing to profile the larval-  
92 associated bacterial communities over the course of morphological plasticity.

93

## 94 **2. Materials and methods**

### 95 *(a) Specimen collection and larval rearing*

96 Adult *L. variegatus* were collected from populations in Back Sound, North Carolina  
97 (NC), USA in July 2017, were transferred to the Duke University Marine Laboratory  
98 (Beaufort, NC) within one hour, and were maintained in flow-through aquaria.

99 Within two days of collections adult sea urchins were spawned by a one to two mL  
100 intracoelomic injection of 0.50 M potassium chloride. Gametes from five males and five  
101 females were pooled separately and the fertilization of eggs (diameter:  $97.9 \mu\text{m} \pm 1.07 \mu\text{m}$ )  
102 and larval rearing followed Strathmann [38], with the exception that embryos and larvae  
103 were reared using 5.0  $\mu\text{m}$  filtered seawater (FSW) to include the environmental microbiota.

104 Briefly, eggs were fertilized (verified using stereomicroscope) using dilute sperm in 100  
105 mL of FSW at ambient temperature and salinity (Figure S1). After fertilization, embryos  
106 were transferred to jars with 3 L of FSW (n=4; Table S1) and diluted to a density of eight  
107 individuals•mL<sup>-1</sup>.

108 For larval feeding, monocultures of the cryptophyte *Rhodomonas lens* were grown in  
109 f/2 media at room temperature with a combination of ambient and artificial lighting for 24  
110 hours per day [39].

111

#### 112 (b) *Experimental feeding and tissue collection*

113 At 24 hours post-fertilization, each jar of prism stage larvae was sub-divided into four  
114 replicates (n=16), diluted to two individuals•mL<sup>-1</sup> in 3 L of FSW, and, at random, were  
115 provided growth medium-free *R. lens* at either 10,000, 1,000, 100, or 0 cells•mL<sup>-1</sup> (n=4 per  
116 diet; Table S1). For the rest of the experiment, larval cultures had daily water changes of  
117 90-95% volume and *R. lens* was replenished to the experimental density.

118 Larvae were differentially fed for five days and samples (n=100 larvae) were taken  
119 daily for each replicate of the four treatments. Immediately after sampling, larval samples  
120 were concentrated into a pellet using a microcentrifuge and the FSW was removed with a  
121 sterile glass pipette. Pelleted larvae were then preserved in RNAlater (Thermo Scientific,  
122 Massachusetts, USA) and stored at -20°C until extraction of nucleic acids.

123

#### 124 (c) *Larval morphology*

125 In addition to sampling the larval-associated bacterial community, twenty larvae  
126 (n=20) from a single replicate of each dietary treatment were sampled for morphometric

127 analysis. Larvae were imaged using a compound microscope (Leitz Labovert; camera:  
128 Olympus DP71) and morphometrics (length of larval body, MBL; post-oral arms, POA;  
129 and stomach area; Figure 1) were performed using ImageJ (v. 1.9.2; [40]). Statistical  
130 differences in larval morphology and stomach volume were compared using a two-way  
131 analysis of variance (ANOVA, cut off  $p=0.05$ ) in JMP Pro (v. 13) to test whether larval  
132 morphology differed across time and between diets. When statistical differences were  
133 detected, we then performed a Tukey's post-hoc test for pairwise comparisons.

134

135 *(d) Assaying bacterial communities*

136 Total DNA was extracted from larval samples using the GeneJet Genomic DNA  
137 Purification Kit (Thermo Scientific), quantified using the NanoDrop 2000 UV-Vis  
138 Spectrophotometer (Thermo Scientific), and diluted to  $5 \text{ ng} \cdot \mu\text{L}^{-1}$  using RNase/DNase-free  
139 water.

140 Bacterial DNA was amplified using primers for the V3/V4 regions of the 16S rRNA  
141 gene (Table S2; [41]). Products were purified using the Axygen AxyPrep Mag PCR Clean-  
142 up Kit (Axygen Scientific), indexed via PCR using the Nextera XT Index Kit V2 (Illumina  
143 Inc.), and then purified again. At each of these three clean up states, fluorometric  
144 quantitation was performed using a Qubit (Life Technologies) and libraries were validated  
145 using a Bioanalyzer High Sensitivity DNA chip (Agilent Technologies). Illumina MiSeq  
146 sequencing (v3, 2x300 bp paired-end reads) was performed at the University of North  
147 Carolina at Charlotte. PCR recipe and thermal profiles are available in Table S2.

148

149 *(e) Computational analysis*

150 Raw reads, along with quality information, were imported into QIIME 2 (v. 2019.1;  
151 [42]), where forward and reverse reads were paired using VSEARCH [43], filtered by  
152 quality score, and denoised using Deblur [44]. QIIME 2-generated ‘features’ were grouped  
153 into operational taxonomic units (OTUs) based on a minimum 99% similarity and were  
154 assigned taxonomy using SILVA (v. 132; [45]). Sequences matching to Archaea as well as  
155 samples with less than 1,000 reads were discarded and the filtered biom table was rarified  
156 to 1,287 sequences (*i.e.*, the read count for the sample with the least remaining reads; Figure  
157 S2).

158 To test whether community membership and composition shift over time, in response  
159 to food availability, and relative to morphology, we calculated unweighted and weighted  
160 UniFrac [46] values and compared them using principal coordinate analyses (PCoA).  
161 Results from these analyses were then recreated and stylized using QIIME 1 (v. 1.9.1; [47])  
162 and Adobe Illustrator CC. To test for differences in membership and composition over the  
163 course of the differential feeding experiment, we used a two-way PERMANOVA and,  
164 subsequently, performed pairwise comparisons. To complement UniFrac values, we also  
165 calculated several measures of alpha diversity (*i.e.*, total OTUs, phylogenetic distance,  
166 McIntosh evenness, and McIntosh dominance) over time and across diets, and compared  
167 these values with a two-way analysis of variance (ANOVA) and, subsequently, performed  
168 by a Tukey’s post-hoc test for pairwise comparisons between diets and times. Lastly, we  
169 summarized the bacterial groups associated with *L. variegatus* larvae and determine which  
170 differ with diet and time using a two-way ANOVA.

171 The QIIME2 pipeline used to convert raw reads to OTUs for visualization of this  
172 data is presented in detail in Note S1.



173

### 174 3. Results

175 As a prefeeding *L. variegatus* larva, the associated bacterial community is comparably  
176 ‘simple’ and significantly different in membership and composition from all later larval  
177 stages (Figure 2; Tables S3-4). At the prefeeding stage, the associated bacterial community  
178 has less OTUs ( $\sim 135 \pm 5$ ), is less phylogenetically diverse, and is less taxonomically  
179 dominant (*i.e.*, more even) than the bacterial community at each ensuing day (Figure 3A-  
180 B, Figure S3).

181 Following one day of development and differential feeding, prefeeding larvae from  
182 each diet became two-arm larvae (Table S5), with the POA:MBL of larvae fed 10,000 and  
183 0 cells•mL<sup>-1</sup> was significantly lower than those fed 1,000 and 100 cells•mL<sup>-1</sup> (Figure 1B;  
184 Tables S6). The membership, composition, phylogenetic diversity, and community  
185 evenness of the larval-associated bacterial community was not significantly different  
186 across feeding regimes while total OTUs and community dominance varied slightly  
187 between dietary treatments (Figures 2, 3, S3; Table S7).

188 A second day of differential feeding resulted in more rapid development for larvae in  
189 the highest food concentration. Larvae fed 10,000 cells•mL<sup>-1</sup> were four-arm larvae while  
190 those fed 1,000, 100, and 0 cells•mL<sup>-1</sup> were maintained as two-arm larvae (Tables S5).  
191 Despite this difference in developmental stage, larvae fed 10,000 and 1,000 cells•mL<sup>-1</sup> had  
192 a similar POA:MBL, which was lower than those fed 100 and 0 cells•mL<sup>-1</sup> (Figures 1;  
193 Tables S6). Dietary treatments also resulted in differences in bacterial communities, where  
194 algal concentrations induced diet-specific bacterial communities in both membership and  
195 composition (Figure 2; Tables S3-4). This led to larval-associated communities with more

196 OTUs and a higher phylogenetic diversity but similar community evenness and dominance  
197 (Figure 3A-B, S3; Table S7), with larvae fed 100 cells•mL<sup>-1</sup> being the most diverse and  
198 those fed 10,000 and 1,000 cells•mL<sup>-1</sup> being the least diverse (Figure 3A-B, S3; Table S7).

199 Independent of diet quantity, *L. variegatus* larvae fed at each algal concentration for  
200 three days were all four-armed with statistically similar POA:MBL (Figure 1; Table S5,  
201 S6). The membership and composition of the bacterial communities associated with larvae  
202 fed 1,000, 100, and 0 cells•mL<sup>-1</sup> were similar while those fed 10,000 cells•mL<sup>-1</sup> differed  
203 significantly (Figure 2; Tables S3-4). A reduction in total OTUs and phylogenetic distance  
204 as well as a more even and less taxonomically dominant community resulted in clear  
205 differential structuring in the bacterial community for larvae fed 10,000 cells•mL<sup>-1</sup>  
206 (Figures 3, S3; Table S7). This response was not observed for larvae fed 1,000, 100, and 0  
207 cells•mL<sup>-1</sup>, as these treatments maintained their community structure from the day prior  
208 (Figures 3, S3; Table S8).

209 As expected based on previous literature for *L. variegatus* [35, 36], morphological  
210 plasticity was observed on the fourth day of differential feeding (Figure 1; Tables S5, S6),  
211 where larvae fed 1,000, 100, and 0 cells•mL<sup>-1</sup> had a higher POA:MBL than those fed  
212 10,000 cells•mL<sup>-1</sup>. Like the day prior, larvae fed 1,000, 100, and 0 cells•mL<sup>-1</sup> associated  
213 with bacterial communities that were similar in membership and composition while larvae  
214 fed 10,000 cells•mL<sup>-1</sup> differed significantly (Figure 2; Tables S3-4). As morphological  
215 plasticity was expressed, the number of OTUs for larvae in these three lower food  
216 concentrations had similar phylogenetic distance (Figure 3; Table S7); however, larvae fed  
217 10,000 cells•mL<sup>-1</sup> continued to associate with a comparatively more even and less  
218 dominant community.

219 Consistent with the previous day, *L. variegatus* maintained expression of  
220 morphological plasticity (Figure 1; Table S6), a result that was not confounded by a  
221 continuation in larval developmental stage (Table S5). On day five of differential feeding,  
222 patterns of community membership and composition (Figure 2; Tables S3-4) as well as  
223 total OTUs, phylogenetic distance, evenness, and dominance all reflected the differences  
224 observed in larval morphology (Figure 3; Table S7). Specifically, larvae fed 10,000  
225 cells•mL<sup>-1</sup> associated with less OTUs that span less phylogenetic distance while  
226 maintaining a more even and less dominant community than larvae fed 1,000, 100, and 0  
227 cells•mL<sup>-1</sup> (Figure 3; Table S7).

228 Spanning the induction and expression of morphological plasticity, prefeeding and  
229 feeding larval stages of *L. variegatus* consisted primarily of three Bacteroidetes (23.5%)  
230 families and eleven Proteobacteria (64.0%) families (Figure S4). Over the three days where  
231 morphological plasticity was expressed, we observed the abundance of all 14 bacterial  
232 families from Bacteroidetes and Proteobacteria differ significantly with time while 11 (of  
233 14) of these bacterial families differed across diets (Table S9). Moreover, we observed that  
234 the abundance of  $\alpha$ - and  $\gamma$ -proteobacteria were inversely proportional (Figure 3C, S4; Table  
235 S10), such that  $\alpha$ -proteobacteria increased following plasticity while  $\gamma$ -proteobacteria  
236 decreased.

237 Across the same three days where morphological plasticity was observed, larvae fed  
238 10,000 cells•mL<sup>-1</sup> stably associated with 114 OTUs (43.7%) while 16-40 OTUs (6.1-  
239 17.6%) were specific to a single day and 19-34 OTUs (7.3-13.0%) were shared between  
240 successive days (Figure 3). Larvae fed 1,000, 100, and 0 cells•mL<sup>-1</sup>, on the other hand,  
241 stably associated with an average of 190 OTUs (56.6%) while 15-19 OTUs (4.5-5.7%)

242 were specific to a single day and 36-39 OTUs (10.7-11.6%) were shared between  
243 successive days (Figure 3). Despite the shifts in community membership, the larval stages  
244 of *L. variegatus* maintained a 'core' of 31 OTUs from the Bacteroidetes (12.9%),  
245 Epsilonbacteraeota (3.2%), and Proteobacteria (83.9%).

246

#### 247 **4. Discussion**

248 Morphological plasticity is an adaptive response to heterogenous environments when  
249 a fitness advantage results relative to an individual with no response [1-3]. Larval sea  
250 urchins, in particular, increase individual fitness in dilute feeding environments by  
251 elongating their feeding structure that, in turn, allows for a greater capacity to filter  
252 particulates and reduce development time [21-23, 26, 34, 36]. Morphological plasticity for  
253 larval sea urchins is also coupled with significant shifts in the associated bacterial  
254 community [9, 31]. The timing of morphological plasticity and associating with a  
255 phenotype-specific bacterial community, however, remains unclear.

256 Daily profiling of the bacterial communities associated with *L. variegatus* larvae over  
257 the course of early development and through morphological plasticity supports three  
258 primary findings. First, a four-stage successional pattern is followed as larvae transition  
259 towards phenotype-specific bacterial communities. Second, the relatedness of the larval-  
260 associated bacterial community directly reflects morphological plasticity and does so prior  
261 to the expression of the phenotype. Third, relatedness of the bacterial communities prior to  
262 and following morphological plasticity implies that the long-arm is the default phenotype.

263 From the initiation of differential feeding through the expression of morphological  
264 plasticity and associating with phenotype-specific bacterial communities, we observed four

265 specific stages for *L. variegatus* larvae. First, ‘Stage 1’ followed one-day of differential  
266 feeding where the bacterial communities across diets were similar in membership and  
267 composition (Figure 4). Second, ‘Stage 2’ followed two-days of differential feeding where  
268 the membership and composition of the larval-associated bacterial communities were diet-  
269 specific (Figure 4). Third, ‘Stage 3’ was observed after three-days of differential feeding  
270 where the membership and composition of the larval-associated bacterial communities  
271 reflected the larval phenotypes while the host had yet to (Figure 4). Lastly, ‘Stage 4’ was  
272 observed following four- and five-days of differential feeding and was where the  
273 relatedness of the bacterial communities correlated with morphological plasticity (Figure  
274 4).

275 The expression of morphological plasticity by temperate Strongylocentrotids [9] show  
276 similar ‘Stages’ to the patterns observed with subtropical/tropical *L. variegatus* larvae.  
277 Specifically, over four weeks of differential feeding for Strongylocentrotids, it was  
278 observed that these larvae exhibit ‘Stages 1, 2, and 4’ [9]. The temporal pattern of these  
279 ‘Stages’ was, however, unclear. Timing by *L. variegatus* larvae provides a fine grain  
280 temporal organization to compare with Strongylocentrotid larvae as well as implies another  
281 stage that was potentially missed. Similarly, differential feeding of a larval sea star  
282 (*Acanthaster* sp.) showed both ‘Stages 1 and 2’ [33], which suggests that these stages may  
283 be broadly conserved in these two distinct classes (Echinoidea and Asteroidea). Consistent  
284 observation of these stages in the literature may imply that these four stages (Figure 4) are  
285 common for echinoderm larvae. Whether these ‘Stages’ are observed for other taxonomic  
286 Classes known to also exhibit morphological plasticity (*e.g.*, Ophiuroidea [48] and  
287 Holothuroidea [49]) is unknown but merits testing.

288 Time lags between experiencing and responding to an environmental stimulus are  
289 common, advantageous, and hypothesized to be under strong selection for species  
290 expressing morphological plasticity [4, 5]. For plasticity to be advantageous, time lags must  
291 be short relative to the time scale of the environmental variant but long enough to minimize  
292 false-positive expression [4, 5, 50]. When faced with fine grain variability in food  
293 abundance, *L. variegatus* larvae are unable to match phenotype with feeding environment,  
294 as the lag for morphological responses exceeds two days [51]. Despite a multi-day time  
295 lag, *L. variegatus* larvae are capable of associating with bacterial communities reflective  
296 of morphological plasticity prior to expressing the morphological trait. This, in principle,  
297 implies that instances where a time lag exceeds the morphological response (*e.g.*, [51]), a  
298 holobiont may exhibit shifts in the associated bacterial community corresponding with the  
299 environmental variation in absence or anticipation of morphological plasticity. The  
300 expression of morphological plasticity also comes with the inherent energetic cost of  
301 producing and maintaining an alternate phenotype [7]; thus, shifts in the bacterial  
302 community may be energetically favored over morphological plasticity in heterogenous  
303 environments.

304 Provided the substantial energetic requirement for planktotrophic echinoids to undergo  
305 larval development [52], laboratory culturing has traditionally simulated conditions  
306 equivalent to phytoplankton blooms. This, in turn, has instilled the general idea that  
307 morphological plasticity requires food deprivation and plasticity is the elongation of the  
308 feeding apparatus [21, 23, 35]. Field culturing, however, suggests the opposite, that  
309 echinoid larvae are naturally food-limited [20, 53, 54] and ‘plasticity’ is shortening the  
310 larval arm and expanding stomach volume in response to uncommon food-rich

311 environments [23]. The molecular mechanisms underlying morphological plasticity have  
312 suggested that algal chemosensations inhibit growth of the larval arms [28] and, thus, the  
313 long-arm phenotype would likely be the default under natural conditions.

314 Following the expression of morphological plasticity, the membership, composition,  
315 and structure of the bacterial communities associated with long-arm *L. variegatus* larvae  
316 mirrored larval siblings prior to plasticity. Simultaneously, the membership and  
317 composition of the bacterial communities associated with short-arm *L. variegatus* larvae  
318 differed significantly from both pre-plasticity and long-arm siblings. This community shift  
319 followed a reduction in total and short-arm-specific OTUs and phylogenetic diversity of a  
320 more even and less dominant community. This implies that well-fed (or short-arm) larvae  
321 deviate from the microbial trajectory of larvae having yet to express plasticity and that the  
322 associated bacterial community may play a role in regulating the short-arm phenotype.

323 Taken together, the data presented here suggests: (i) that phenotype-specific bacterial  
324 communities for larval *L. variegatus* follow a four-stage progression (Figure 4); (ii) that  
325 shift in bacterial taxa precedes morphological plasticity and occur during the time lag; and  
326 (iii) that the long-arm phenotype is most similar to pre-plasticity larval siblings and the  
327 short-arm phenotype correlates with a restructuring of the bacterial community.  
328 Determining if and how this community contributes to larval fitness during before, during,  
329 and following the expression of morphological plasticity merits future investigation and  
330 would require multi-omic comparisons [55] between axenic and germ-rich siblings (*e.g.*,  
331 [56-58]) as well as add-back experiments of individual bacterial taxa (*e.g.*, [59-61]).

332

333 **Acknowledgements.** We thank Daniel Rittschof (Duke Univ.) for providing laboratory  
334 space; Beatriz Orihuela (Duke Univ.) for endless logistical assistance; Josh Osterberg  
335 (Duke Univ.) for collecting adult urchins; Karen Lopez (UNC Charlotte) for technical  
336 assistance with sequencing; Daniel Janies (UNC Charlotte) for sequencing resources; and  
337 Justin McAlister (Holy Cross Univ.) and Jason Hodin (Univ. Washington) for discussions  
338 on morphological plasticity in echinoid larvae.

339

340 **Data accessibility.** The raw sequence reads as part of this dataset are available on the  
341 Dryad Digital Repository.

342

343 **Funding statement.** This work was supported by an NSF Graduate Research Fellowship  
344 to TJC, a Human Frontier Science Program Award to AMR (RGY0079/2016) and a North  
345 Carolina Sea Grant award to AMR and TJC (2016-R/MG-1604).

346



347 **Figure legend**

348

349 **Figure 1.** Egg size and morphometrics of *Lytechinus variegatus* larvae. (A) Mean egg  
350 diameter ( $\pm$  standard error) of unfertilized eggs. (B) Post-oral arm to mid body line ratio  
351 and (C) stomach volume ( $\pm$  standard error) of larvae having been fed either 10,000 (dark  
352 green), 1,000 (medium green), 100 (light green), and 0 cells•mL<sup>-1</sup> (white) over the course  
353 of five days.

354

355 **Figure 2.** Dietary and temporal shifts in the bacterial community associated with  
356 *Lytechinus variegatus* larvae. Community similarity of *L. variegatus* larval-associated  
357 bacterial communities based on food availability (10,000, 1,000, 100, and 0 cells•mL<sup>-1</sup> of  
358 a phytoplankton represented by blue, red, green and purple, respectively) over a multi-day  
359 exposure (prefeeding were yellow-circles while day 1, 2, 3, 4, and 5 were represented by a  
360 square, rightward triangle, upward triangle, leftward triangle, and downward triangle,  
361 respectively). Comparisons between food availability and over time are based on  
362 unweighted (left) and weighted (right) UniFrac values.

363

364 **Figure 3.** Structural changes to the bacterial community associated with *Lytechinus*  
365 *variegatus* larvae. (A) Enumeration of operational taxonomic units (OTUs) and  
366 phylogenetic distance of those OTUs for *L. variegatus* larvae from prefeeding through five  
367 days of feeding on either (10,000, 1,000, 100, and 0 cells•mL<sup>-1</sup> of a phytoplankton  
368 represented by blue, red, green and purple, respectively). (B) Unweighted distribution of  
369 bacterial taxa for *L. variegatus* larvae from either of the larval phenotypes, and the (C) total

370 sequences (from the rarefied table) of  $\alpha$ - and  $\gamma$ -proteobacteria for these time points and  
371 diets.

372

373 **Figure 4.** Dynamics of the bacterial community during morphological plasticity. Visual  
374 model representation of morphological plasticity for echinoid larvae and the four  
375 successive stages towards associations with a phenotype-specific bacterial community.

376

377

378 **Literature**

- 379 1. Miner B.G., Sultan S.E., Morgan S.G., Padilla D.K., Relyea R.A. 2005 Ecological  
380 consequences of phenotypic plasticity. *Trends in Ecology & Evolution* **20**, 685-692.
- 381 2. Sterns S. 1989 The evolutionary significance of phenotypic plasticity. *BioScience*  
382 **39**(7), 436-445.
- 383 3. West-Eberhard M. 2003 *Developmental Plasticity and Evolution*. Oxford, UK, Oxford  
384 University Press.
- 385 4. Padilla D.K., Adolph S.C. 1996 Plastic inducible morphologies are not always  
386 adaptive: the importance of time delays in a stochastic environment. *Evol Ecol* **10**, 105-  
387 117.
- 388 5. Levins R. 1968 *Evolution in Changing Environments*. Princeton, NJ, Princeton  
389 University Press.
- 390 6. Agrawal A.A. 2001 Phenotypic plasticity in the interactions and evolution of species.  
391 *Science* **294**, 321-326.
- 392 7. DeWitt T.J., Sih A., Wilson D.S. 1998 Costs and limits of phenotypic plasticity. *Trends*  
393 *in Ecology & Evolution* **13**, 77-81.
- 394 8. Bittleston L.S., Wolock C.J., Yahya B.E., Chan X.Y., Chan K.G., Pierce N.E., Pringle  
395 A. 2018 Convergence between the microcosms of Southeast Asian and North American  
396 pitcher plants. *eLife* **7**, e36741.
- 397 9. Carrier T.J., Reitzel A.M. 2018 Convergent shifts in host-associated microbial  
398 communities across environmentally elicited phenotypes. *Nature Communications* **9**,  
399 952.

- 400 10. Gilbert S.F., Sapp J., Tauber A.I. 2012 A symbiotic view of life: we have never been  
401 individuals. *Q Rev Biol* **87**, 325-341.
- 402 11. McFall-Ngai M., Hadfield M.G., Bosch T.C.G., Carey H.V., Domazet-Loso T.,  
403 Douglas A.E., Dubilier N., Eberl G., Fukami T., Gilbert S.F., et al. 2013 Animals in a  
404 bacterial world, a new imperative for the life sciences. *P Natl Acad Sci USA* **110**, 3229-  
405 3236.
- 406 12. Zilber-Rosenberg I., Rosenberg E. 2008 Role of microorganisms in the evolution of  
407 animals and plants: the hologenome theory of evolution. *Fems Microbiol Rev* **32**, 723-  
408 735.
- 409 13. Carrier T.J., Reitzel A.M. 2017 The hologenome across environments and the  
410 implications of a host-associated microbial repertoire. *Frontiers in Microbiology* **8**,  
411 802.
- 412 14. Kohl K.D., Carey H.V. 2016 A place for host-microbe symbiosis in the comparative  
413 physiologist's toolbox. *Journal of Experimental Biology* **219**, 3496-3504.
- 414 15. Burke B., Steinberg P., Rusch D., Kjelleberg S., Thomas T. 2011 Bacterial community  
415 assembly based on functional genes rather than species. *P Natl Acad Sci USA* **108**,  
416 14288-14293.
- 417 16. Louca S., Jacques S.M.S., Pires A.P.F., Leal J.S., Srivastava D.S., Parfrey L.W.,  
418 Farjalla V.F., Doebeli M. 2016 High taxonomic variability despite stable functional  
419 structure across microbial communities. *Nature Ecology & Evolution* **1**, 15.
- 420 17. Roth-Schulze A.J., Pintado J., Zozaya-Valdés E., Cremades J., Ruiz P., Kjelleberg S.,  
421 Thomas T. 2018 Functional biogeography and host specificity of bacterial communities  
422 associated with the marine green alga *Ulva* spp. *Molecular Ecology* **27**, 1952-1965.

- 423 18. Bordenstein S.R., Theis K.R. 2015 Host biology in light of the microbiome: ten  
424 principles of holobionts and hologenomes. *Plos Biol* **13**, e1002226.
- 425 19. Kohl K.D., Amaya J., Passemant C.A., Dearing M.D., McCue M.D. 2014 Unique and  
426 shared responses of the gut microbiota to prolonged fasting: a comparative study across  
427 five classes of vertebrate hosts. *FEMS Microbiol Ecol* **90**, 883-894.
- 428 20. Olson R.R., Olson M.H. 1989 Food limitation of planktotrophic marine invertebrate  
429 larvae: does it control recruitment success? *Annu Rev Ecol Syst* **20**, 225-247.
- 430 21. McAlister J.S., Miner B.G. 2018 Phenotypic plasticity of feeding structures in marine  
431 invertebrate larvae. In *Evolutionary Ecology of Marine Invertebrate Larvae* (eds.  
432 Carrier T.J., Reitzel A.M., Heyland A.). Oxford, UK, Oxford University Press.
- 433 22. Hart M.W., Strathmann R.R. 1994 Functional consequences of phenotypic plasticity in  
434 echinoid larvae. *Biological Bulletin* **186**, 291-299.
- 435 23. Miner B.G. 2004 Evolution of feeding structure plasticity in marine invertebrate larvae:  
436 a possible trade-off between arm length and stomach size. *Journal of Experimental*  
437 *Marine Biology and Ecology* **315**, 117-125.
- 438 24. Sewell M.A. 2005 Utilization of lipids during early development of the sea urchin  
439 *Evechinus chloroticus*. *Mar Ecol Prog Ser* **304**, 133-142.
- 440 25. Sewell M.A., Cameron M.J., McArdle B.H. 2004 Developmental plasticity in larval  
441 development in the echinometrid sea urchin *Evechinus chloroticus* with varying food  
442 rations. *Journal of Experimental Marine Biology and Ecology* **309**, 219-237.
- 443 26. Soars N.A., Prowse T.A.A., Byrne M. 2009 Overview of phenotypic plasticity in  
444 echinoid larvae, ‘*Echinopluteus transversus*’ type vs. typical echinoplutei. *Mar Ecol*  
445 *Prog Ser* **383**, 113-125.

- 446 27. Strathmann R.R., Fenaux L., Strathmann M.F. 1992 Heterochronic developmental  
447 plasticity in larval sea urchins and its implications for evolution of nonfeeding larvae.  
448 *Evolution* **46**, 972-986.
- 449 28. Adams D.K., Sewell M.A., Angerer R.C., Angerer L.M. 2011 Rapid adaptation to food  
450 availability by a dopamine-mediated morphogenetic response. *Nature Communications*  
451 **2**, 592.
- 452 29. Carrier T.J., King B.L., Coffman J.A. 2015 Gene expression changes associated with  
453 the developmental plasticity of sea urchin larvae in response to food availability.  
454 *Biological Bulletin* **228**, 171-180.
- 455 30. Carrier T.J., Reitzel A.M. 2019 Bacterial community dynamics during embryonic and  
456 larval development of three confamilial echinoids. *Mar Ecol Prog Ser* **611**, 179-188.
- 457 31. Carrier T.J., Dupont S., Reitzel A.M. Submitted Geography, not food availability,  
458 reflects compositional differences in the bacterial communities associated with larval  
459 sea urchins.
- 460 32. Carrier T.J., Macrander J., Reitzel A.M. 2018 A microbial perspective on the life-  
461 history evolution of marine invertebrate larvae: if, where, and when to feed. *Marine*  
462 *Ecology* **39**, e12490.
- 463 33. Carrier T.J., Wolfe K., Lopez K., Gall M., Janies D.A., Byrne M., A.M. R. 2018 Diet-  
464 induced shifts in the crown-of-thorns (*Acanthaster* sp.) larval microbiome. *Marine*  
465 *Biology* **165**, 157.
- 466 34. Byrne M., Sewell M.A., Prowse T.A.A. 2008 Nutritional ecology of sea urchin larvae:  
467 influence of endogenous and exogenous nutrition on echinopluteal growth and  
468 phenotypic plasticity in *Tripneustes gratilla*. *Functional Ecology* **22**, 643-648.

- 469 35. McEdward L.R., Herrera J.C. 1999 Body form and skeletal morphometrics  
470 during larval development of the sea urchin *Lytechinus variegatus*. *Journal of*  
471 *Experimental Marine Biology and Ecology* **232**, 151-176.
- 472 36. Boidron-Metairon I.F. 1988 Morphological plasticity in laboratory-reared echinoplutei  
473 of *Dendraster excentricus* (Eschscholtz) and *Lytechinus variegatus* (Lamarck) in  
474 response to food conditions. *Journal of Experimental Marine Biology and Ecology* **119**,  
475 31-41.
- 476 37. McAlister J.S. 2007 *The long arm of the larva: evolutionary responses to resource*  
477 *availability*, University of North Carolina at Chapel Hill.
- 478 38. Strathmann M.F. 1987 *Reproduction and development of marine invertebrates of the*  
479 *northern Pacific coast: data and methods for the study of eggs, embryos, and larvae*,  
480 University of Washington Press.
- 481 39. Guillard R.R.L. 1975 Culture of phytoplankton for feeding marine invertebrates. In  
482 *Culture of Marine Invertebrate Animals* (eds. Smith W.L., Chanley M.H.). New York,  
483 USA, Plenum Press.
- 484 40. Schneider C., Rasband W., Eliceiri K. 2012 NIH Image to ImageJ: 25 years of image  
485 analysis. *Nat Methods* **9**, 671-675.
- 486 41. Klindworth A., Pruesse E., Schweer T., Peplies J., Quast C., Horn M., Glockner F.O.  
487 2013 Evaluation of general 16S ribosomal RNA gene PCR primers for classical and  
488 next-generation sequencing-based diversity studies. *Nucleic Acids Research* **41**, e1.
- 489 42. Bolyen E., Rideout J.R., Dillon M.R., Bokulich N.A., Abnet C., Al-Ghalith G.A.,  
490 Alexander H., Alm E.J., Arumugam M., Asnicar F., et al. 2018 QIIME 2: Reproducible,

- 491 interactive, scalable, and extensible microbiome data science. *PeerJ Preprints* **6**,  
492 e27295v27292.
- 493 43. Rognes T., Flouri T., Nichols B., Quince C., Mahé F. 2016 VSEARCH: a versatile  
494 open source tool for metagenomics. *PeerJ* **4**, e2584.
- 495 44. Amir A., McDonald D., Navas-Molina J.A., Kopylova E., Morton J.T., Xu Z.Z.,  
496 Kightley E.P., Thompson L.R., Hyde E.R., Gonzalez A., et al. 2017 Deblur rapidly  
497 resolves single-nucleotide community sequence patterns. *mSystems* **2**, e00191-00116.
- 498 45. Quast C., Pruesse E., Yilmaz P., Gerken J., Schweer T., Yarza P., Peplies J., Glockner  
499 F.O. 2013 The SILVA ribosomal RNA gene database project: improved data  
500 processing and web-based tools. *Nucleic Acids Research* **41**, 590-596.
- 501 46. Lozupone C., Knight R. 2005 UniFrac: a new phylogenetic method for comparing  
502 microbial communities. *Applied and Environmental Microbiology* **71**, 8228-8235.
- 503 47. Caporaso J.G., Kuczynski J., Stombaugh J., Bittinger K., Bushman F.D., Costello E.K.,  
504 Fierer N., Pena A.G., Goodrich J.K., Gordon J.I., et al. 2010 QIIME allows analysis of  
505 high-throughput community sequencing data. *Nat Methods* **7**, 335-336.
- 506 48. Podolsky R.D., McAlister J.S. 2005 Developmental plasticity in *Macrophiothrix*  
507 brittlestars: are morphologically convergent larvae also convergently plastic?  
508 *Biological Bulletin* **209**, 127-138.
- 509 49. Sun X.-J., Li Q. 2013 The effect of food availability on development and phenotypic  
510 plasticity in larvae of the sea cucumber (*Apostichopus japonicus*). *Invertebrate*  
511 *Reproduction and Development* **57**, 255-263.
- 512 50. Palumbi S.R. 1984 Tactics of acclimation: morphological changes of sponges in an  
513 unpredictable environment. *Science* **225**, 1478-1480.



- 514 51. Miner B.G., Vonesh J.R. 2004 Effects of fine grain environmental variability on  
515 morphological plasticity. *Ecol Lett* **7**, 794-801.
- 516 52. Mileikovsky S.A. 1971 Types of larval development in marine bottom invertebrates,  
517 their distribution and ecological significance: a re-evaluation. *Marine Biology* **10**, 193-  
518 213.
- 519 53. Fenaux L., Strathmann M.F., Strathmann R.R. 1994 Five tests of food-limited growth  
520 of larvae in coastal waters by comparison of rates of development and form of  
521 echinoplutei. *Limnology and Oceanography* **39**, 84-98.
- 522 54. Pauley G., Boring L., Strathmann R.R. 1985 Food limited growth and development of  
523 larvae: experiments with natural sea water. *Journal of Experimental Marine Biology*  
524 *and Ecology* **93**, 1-10.
- 525 55. Williams E.A., Carrier T.J. 2018 An -omics perspective on marine invertebrate larvae.  
526 In *Evolutionary Ecology of Marine Invertebrate Larvae* (eds. Carrier T.J., Reitzel  
527 A.M., Heyland A.), pp. 288-304. Oxford, UK, Oxford University Press.
- 528 56. Smith K., McCoy K.D., Macpherson A.J. 2007 Use of axenic animals in studying the  
529 adaptation of mammals to their commensal intestinal microbiota. *Seminars in*  
530 *Immunology* **19**, 59-69.
- 531 57. Manahan D.T., Davis J.P., Stephens G.C. 1993 Bacteria-free sea urchin larvae:  
532 selective uptake of neutral amino acids from seawater. *Science* **220**, 204-206.
- 533 58. Bates J.M., Mittge E., Kuhlman J., Baden K.N., Cheesman S.E., Guillemin K. 2006  
534 Distinct signals from the microbiota promote different aspects of zebrafish gut  
535 differentiation. *Dev Biol* **297**, 374-386.

- 536 59. Fraune S., Anton-Erxleben F., Augustin R., Franzenburg S., Knop M., Schröder K.,  
537 Willoweit-Ohl D., Bosch T.C.G. 2015 Bacteria-bacteria interactions within the  
538 microbiota of the ancestral metazoan *Hydra* contribute to fungal resistance. *ISME*  
539 *Journal* **9**, 1543-1556.
- 540 60. Murillo-Rincon A.P., Klimovich A., Pemöller E., Taubenheim J., Mortzfeld B.,  
541 Augustin R., Bosch T.C.G. 2017 Spontaneous body contractions are modulated by the  
542 microbiome of *Hydra*. *Scientific Reports* **7**, 15937.
- 543 61. Wein T., Dagan T., Fraune S., Bosch T.C.G., Reusch T.B.H., Hülter N.F. 2018  
544 Carrying capacity and colonization dynamics of *Curvibacter* in the *Hydra* host habitat.  
545 *Frontiers in Microbiology* **9**, 443.
- 546

1 **Figure 1**  
2

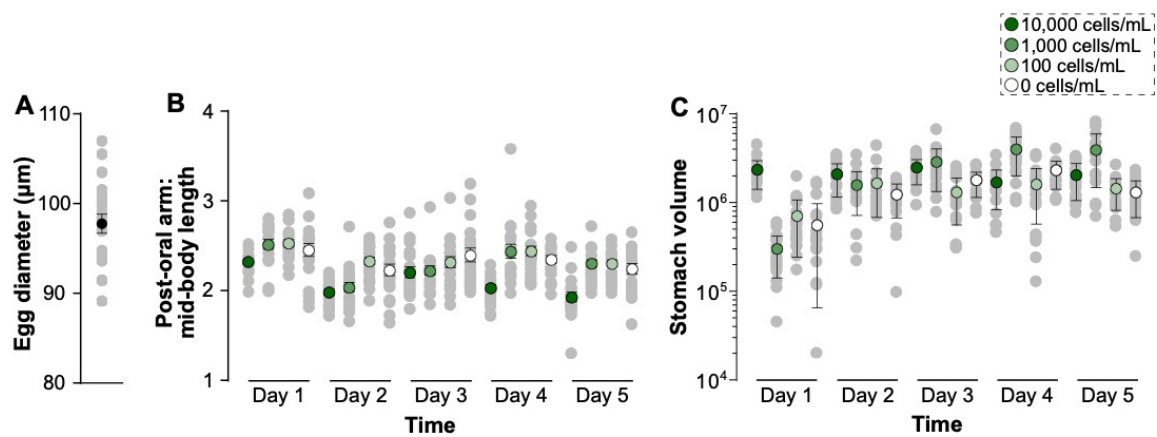

3  
4  
5

6 **Figure 2**

7

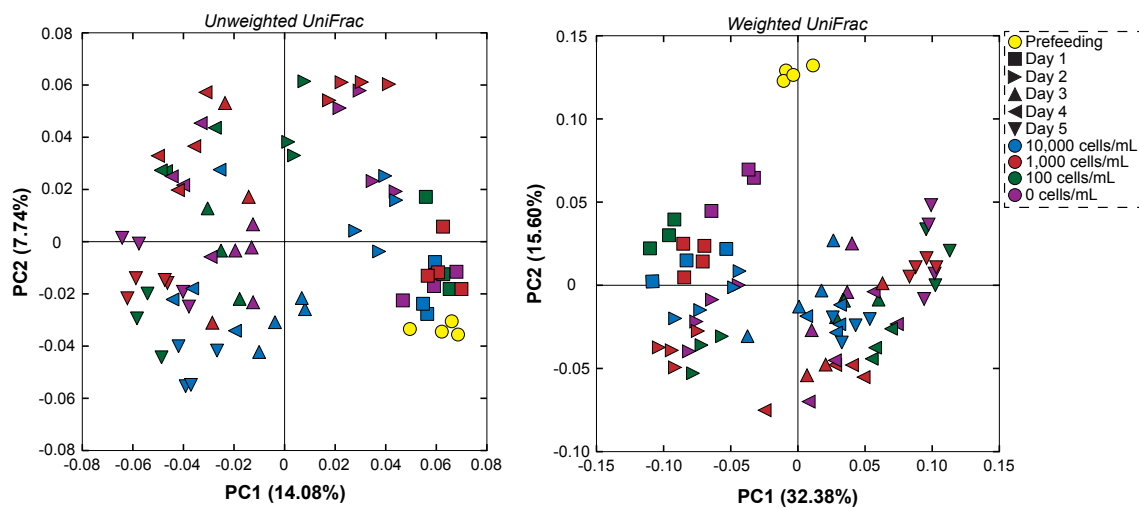

8

9

10

11 **Figure 3**  
12

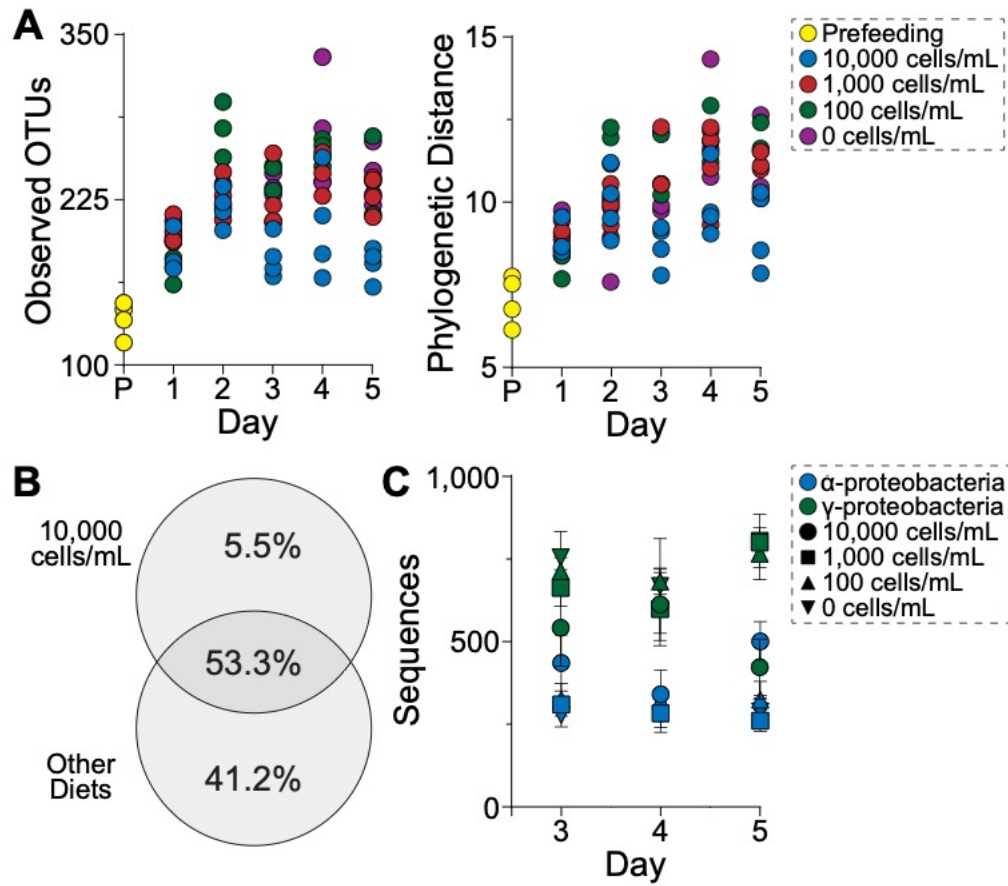

13  
14  
15

16 **Figure 4**  
17

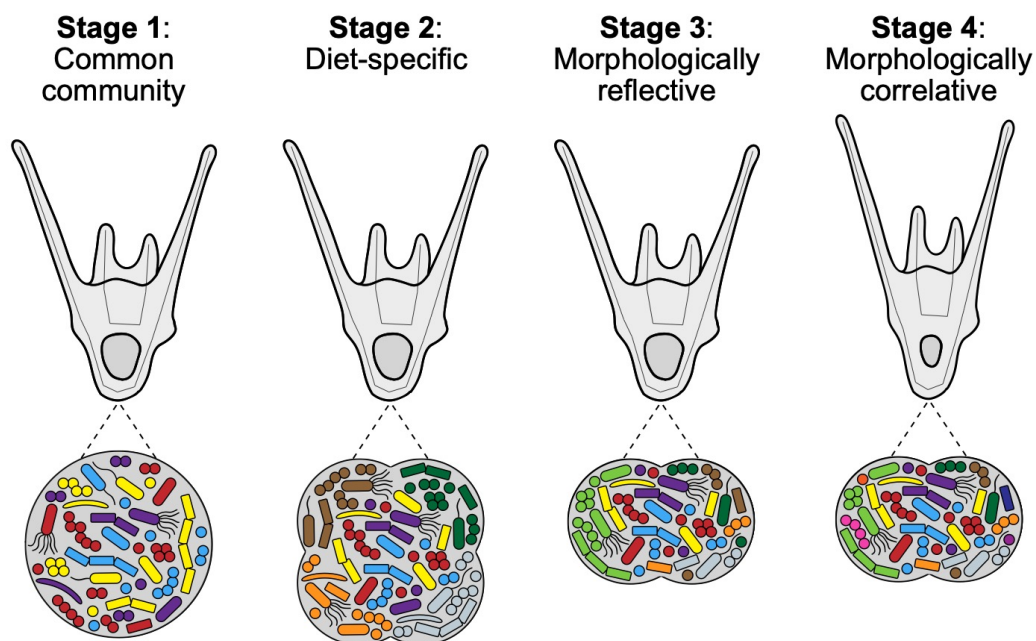

18  
19  
20

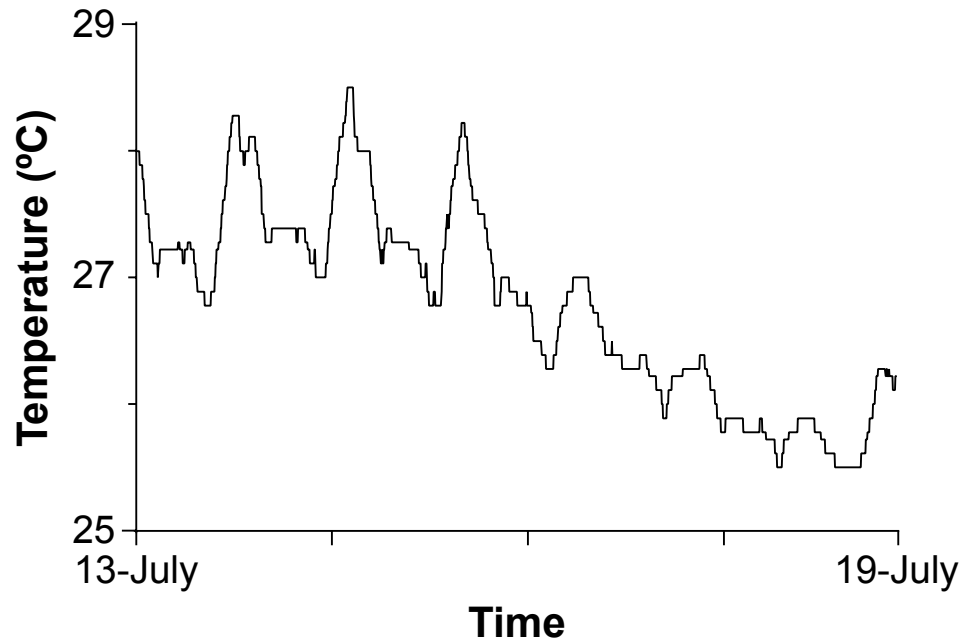

1  
2  
3  
4  
5  
6  
7

**Figure S1.** *in situ* measurements of sea surface temperature at the Duke University Marine Laboratory. Sea surface temperature at Beaufort, NC (NOAA station, BFTN7) for the entirety of larval experimentation (13-19 July 2017).

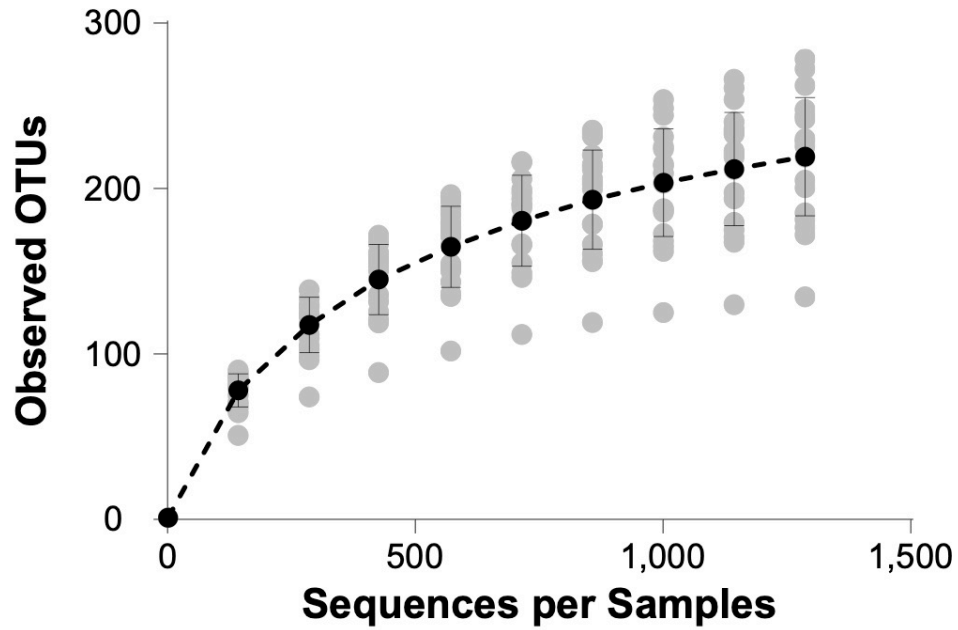

8  
9  
10  
11  
12  
13  
14  
15

**Figure S2.** Alpha rarefaction curve for *Lytechinus variegatus* larvae. Alpha rarefaction curve for the associated bacteria with for *L. variegatus* from prefeeding through five days of feeding on either 10,000, 1,000, 100, and 0 cells•mL<sup>-1</sup> of a phytoplankton based on the rarefaction depth (1,287 sequences) used for all analyses.



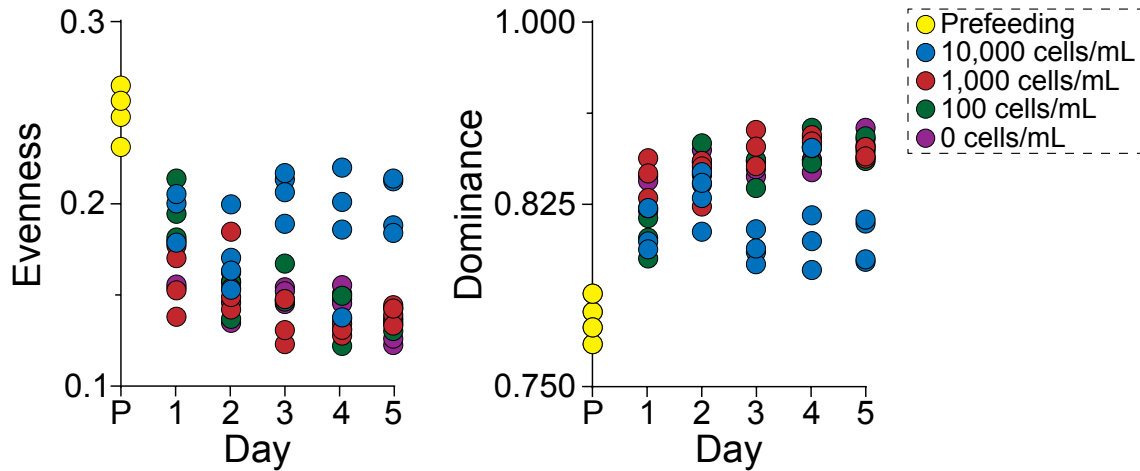

16  
17  
18  
19  
20  
21  
22  
23

**Figure S3.** Changes in alpha diversity metrics to the bacterial community associated with *Lytechinus variegatus* larvae. Evenness and dominance of bacterial taxa for *L. variegatus* larvae from prefeeding through five days of feeding on either 10,000, 1,000, 100, and 0 cells•mL<sup>-1</sup> of a phytoplankton (represented by blue, red, green and purple, respectively).

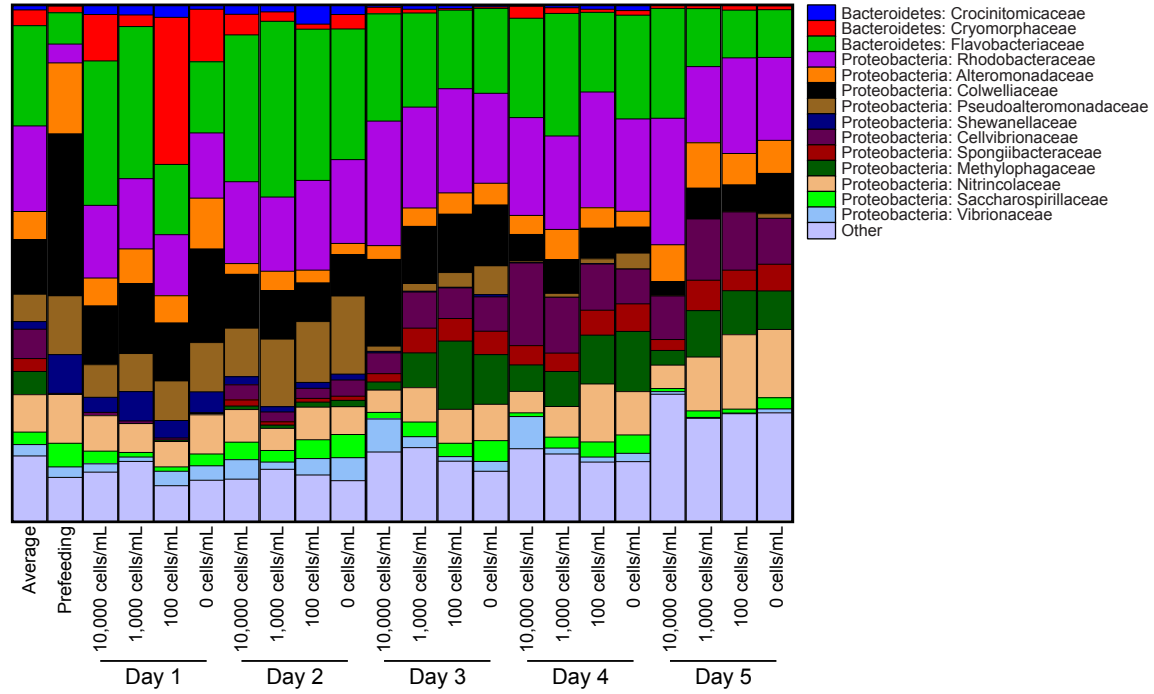

24  
25  
26  
27  
28  
29

**Figure S4.** Bacterial taxa associated with differentially fed *Lytechinus variegatus* larvae. Bacterial family associated with *L. variegatus* larvae fed either 10,000, 1,000, 100, or 0 cells mL<sup>-1</sup> over the course of five days of differential feeding.
